# Supplementary material for: In-situ abiogenic methane synthesis from diamond and graphite under geologically relevant conditions
Source: Springer Nature journal article supplement (doi:10.1038/s41467-021-26664-3), 2021-11-04
Supplement: MOESM1 [file 41467_2021_26664_MOESM1_ESM.pdf]

# ***Supplementary materials for: “In-situ abiogenic methane synthesis from diamond and graphite under geologically relevant conditions”***

Miriam Peña-Alvarez<sup>1</sup>, Alberto Vitale Brovarone<sup>2,3</sup>, Mary-Ellen Donnelly<sup>4</sup>, Mengnan Wang<sup>1</sup>, Philip Dalladay-Simpson<sup>4</sup>, Ross Howie<sup>4</sup>, Eugene Gregoryanz<sup>1,4,5</sup>

<sup>1</sup>Centre for Science at Extreme Conditions and School of Physics and Astronomy,

University of Edinburgh, Edinburgh, U.K.

<sup>2</sup> Dipartimento di Scienze Biologiche, Geologiche e Ambientali (BiGeA), Alma Mater Studiorum

Università di Bologna, Piazza di Porta San Donato 1, 40126 Bologna, Italy

<sup>3</sup>Sorbonne Université, Muséum National d’Histoire Naturelle, UMR CNRS 7590, IRD, Institut de

Minéralogie, de Physique des Matériaux et de Cosmochimie, IMPMC, 75005 Paris, France

<sup>4</sup>Center for High Pressure Science and Technology Advanced Research, Shanghai, China

<sup>5</sup>Key Laboratory of Materials Physics, Institute of Solid State Physics,

Chinese Academy of Sciences, Hefei, China.

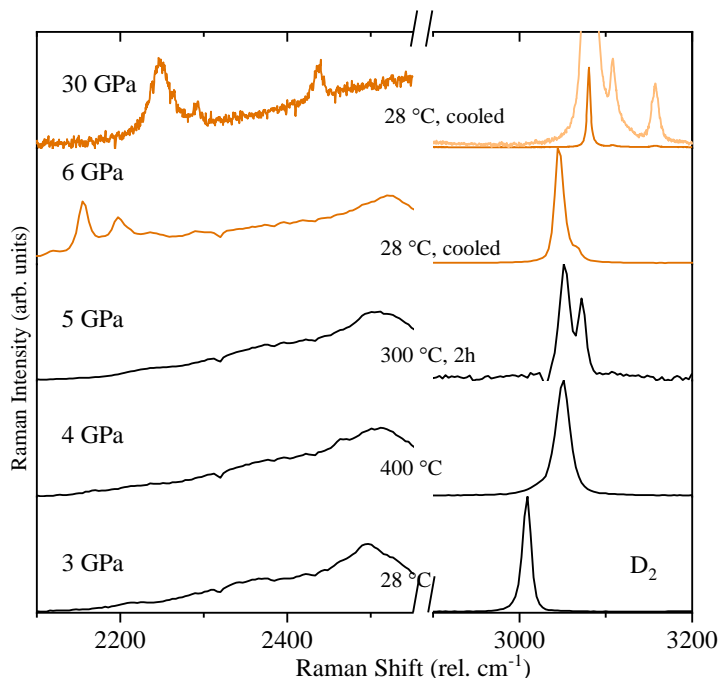

**Supplementary Figure 1. Resistive heating of deuterium in diamond anvil cell.** During the heating cycle pressure was increasing from 3 to 6 GPa. After quenching pressure was increased to 30 GPa at room temperature to compare the frequencies of the synthesised product with those of deuterated methane (see Supplementary Figure S2).

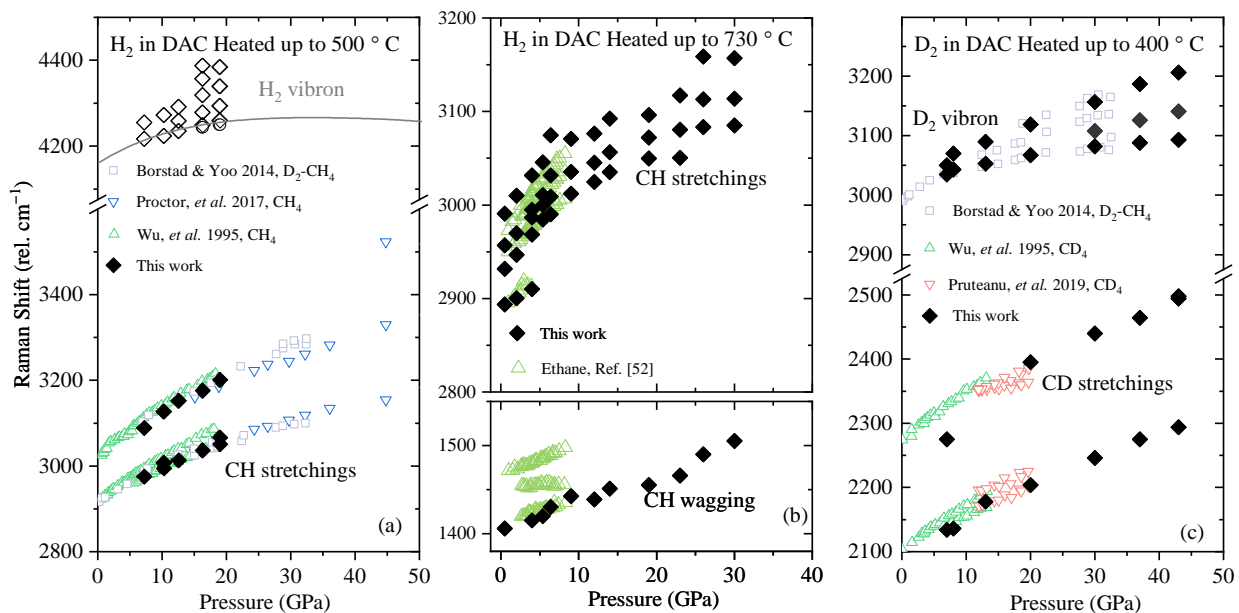

**Supplementary Figure 2. Comparison of the Raman frequencies of the synthesised products in our experiments during compression with data from literature.** (a) Methane and hydrogen. (b) Ethane. (c)

Deuterated methane. The literature data for comparison are taken from: Wu, *et al* [1] and Pruteanu, *et al.* [2] for CD<sub>4</sub>; Borstad, *et al.* [3] and Proctor *et al.* [4] for D<sub>2</sub> and CH<sub>4</sub>; Howie, *et al.* [5] for H<sub>2</sub>.

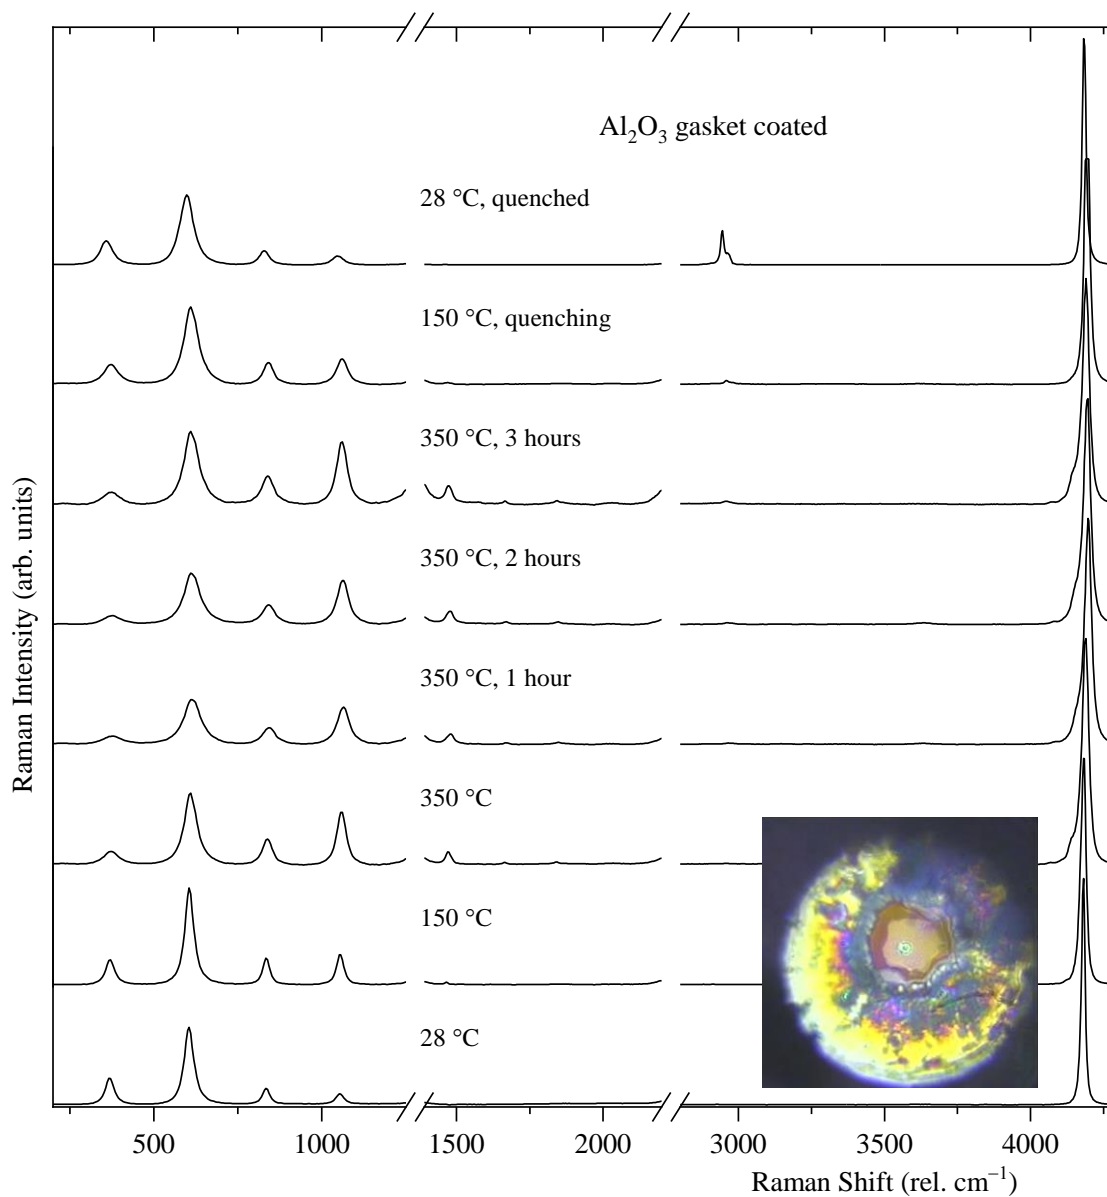

**Supplementary Figure 3. Raman spectra of H<sub>2</sub> during a heating cycle at 3 GPa using a coated gasket with an insulating Al<sub>2</sub>O<sub>3</sub> layer.** In this experiment the rhenium gasket was coated with Al<sub>2</sub>O<sub>3</sub> chemically vapour deposited 500 nm thick on both sides.

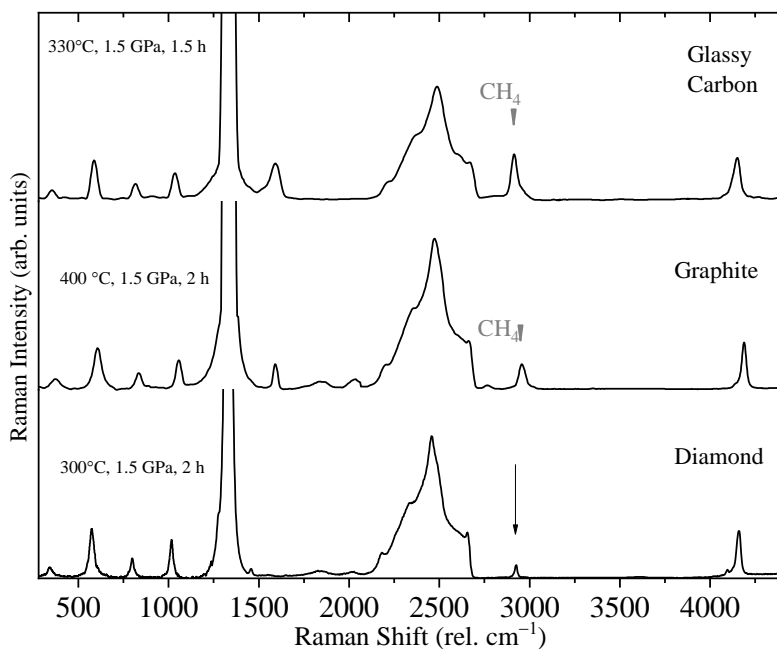

**Supplementary Figure 4. Comparison of resistive heating of hydrogen in DAC.** From bottom to top: H<sub>2</sub> in the chamber, hydrogen with graphite and glassy carbon with hydrogen.

**Supplementary Table 1. Summary of the experimental runs**

| N:             | gas ket | Lining to protect gasket                                                                                  | max T °C | Time of heating run, approx. | Pressure during experiment | Product                                        |
|----------------|---------|-----------------------------------------------------------------------------------------------------------|----------|------------------------------|----------------------------|------------------------------------------------|
| H <sub>2</sub> | Re      | Au                                                                                                        | 705 °C   | Kept for 10 min 705 °C       | 2-4 GPa                    | CH <sub>4</sub>                                |
| H <sub>2</sub> | Re      | Au                                                                                                        | 605 °C   | Kept for 1 hour 605 °C       | 2-4 GPa                    | CH <sub>4</sub>                                |
| H <sub>2</sub> | W       | Au                                                                                                        | 375 °C   | Kept for 20 min 375 °C       | 2-4 GPa                    | CH <sub>4</sub>                                |
| H <sub>2</sub> | Re      | Au                                                                                                        | 550 °C   | Kept for 2 hours at 550 °C   | 1-3 GPa                    | CH <sub>4</sub>                                |
| H <sub>2</sub> | W       | None                                                                                                      | 600 °C   | Kept for 10 min 600 °C       | 1-3 GPa                    | CH <sub>4</sub>                                |
| H <sub>2</sub> | Re      | None                                                                                                      | 730 °C   | Kept for 2 hours at 500 °C   | 1-3 GPa                    | C <sub>2</sub> H <sub>8</sub><br>(ethane)      |
| H <sub>2</sub> | W       | None                                                                                                      | 550 °C   | Kept for 2 hours at 400 °C   | 1-3 GPa                    | CH <sub>4</sub>                                |
| H <sub>2</sub> | W       | None                                                                                                      | 550 °C   | Kept for 2 hours at 400 °C   | 1-3 GPa                    | CH <sub>4</sub>                                |
| H <sub>2</sub> | Re      | None                                                                                                      | 550 °C   | Kept for 2 hours at 400 °C   | 0.5-1.8 GPa                | CH <sub>4</sub>                                |
| H <sub>2</sub> | Re      | None                                                                                                      | 400 °C   | Kept for 3 hours at 400 °C   | 1-3 GPa                    | CH <sub>4</sub>                                |
| H <sub>2</sub> | Re      | None                                                                                                      | 400 °C   | Kept for 3 hours at 400 °C   | 1-3 GPa                    | CH <sub>4</sub>                                |
| H <sub>2</sub> | Re      | None                                                                                                      | 330 °C   | Kept for 3 hours at 330 °C   | 1-2 GPa                    | CH <sub>4</sub>                                |
| H <sub>2</sub> | Re      | Diamonds coated with Al <sub>2</sub> O <sub>3</sub> and gasket coated with Al <sub>2</sub> O <sub>3</sub> | 500 °C   | Kept for 3 hours at 360 °C   | 3-4 GPa                    | Traces of methane after the coating peeled off |
| H <sub>2</sub> | Re      | Gasket coated with Al <sub>2</sub> O <sub>3</sub>                                                         | 350 °C   | Kept for 3 hours at 350 °C   | 1-4 GPa                    | CH <sub>4</sub>                                |

|                |    |                                                     |        |                                                     |         |                                                |
|----------------|----|-----------------------------------------------------|--------|-----------------------------------------------------|---------|------------------------------------------------|
| H <sub>2</sub> | Re | Diamonds coated with Al <sub>2</sub> O <sub>3</sub> | 500 °C | Kept for 3 hours at 350 °C                          | 2-4 GPa | Traces of methane after the coating peeled off |
| D <sub>2</sub> | Re | None                                                | 750 °C | Kept for 1 hour at 325 C. T was increased to 750 °C | 2-4 GPa | CD <sub>4</sub>                                |
| D <sub>2</sub> | Re | Au                                                  | 500 °C | Kept for 1 hour at 300 C                            | 2-4 GPa | CD <sub>4</sub>                                |
| D <sub>2</sub> | Re | Au                                                  | 480 °C | Kept for 2 hours at 480 C                           | 2-4 GPa | CD <sub>4</sub>                                |
| D <sub>2</sub> | W  | none                                                | 750 °C | Kept for 1 hour at 300 C                            | 2-4 GPa | CD <sub>4</sub>                                |

[1] Wu, Y., Sasaki, S. & Shimizu, H. High-pressure Raman study of dense methane: CH<sub>4</sub> and CD<sub>4</sub>. *Journal of Raman Spectroscopy* 26, 963–967 (1995).

[2] Pruteanu, C. G. The effect of deuteration on the optical spectra of compressed methane. *AIP Advances* 9, 045033 (2019).

[3] Borstad, G. M. & Yoo, C.-S. Hydrogen bonding induced proton exchange reactions in dense D<sub>2</sub>-NH<sub>3</sub> and D<sub>2</sub>-CH<sub>4</sub> mixtures. *The Journal of Chemical Physics* 140, 044510 (2014).

[4] Proctor, J. E., Maynard Casely, H. E., Hakeem, M. A. & Cantiah, D. Raman spectroscopy of methane (CH<sub>4</sub>) to 165 GPa: Effect of structural changes on Raman spectra. *Journal of Raman Spectroscopy* 48, 1777 – 1782 (2017).

[5] Howie, R. T., Guillaume, C. L., Scheler, T., Goncharov, A. F., Gregoryanz, E. Mixed molecular and atomic phase of dense hydrogen. *Physical Review Letters* 108, 125501 (2012).
